# Supplementary material for: Robust and economic reduction protocol employing immensely stable and leach-proof magnetically separable nanocomposites
Source: Royal Society of Chemistry journal article supplement (doi:10.1039/c6ra17387j), 2016-01-01
Supplement: c6ra17387j1.pdf [file c6ra17387j1.pdf]

## **Robust and economic reduction protocol employing immensely stable and leach-proof magnetically separable nanocomposites**

**Ankita Goyal<sup>a</sup> and Sonal Singhal<sup>a\*</sup>**

<sup>a</sup>Department of Chemistry, Panjab University, Chandigarh, India-160014.

\*[sonal1174@gmail.com](mailto:sonal1174@gmail.com); [sonal@pu.ac.in](mailto:sonal@pu.ac.in)

**CORRESPONDING AUTHOR:** Sonal Singhal  
Associate Professor,  
Department of Chemistry,  
Panjab University,  
Chandigarh, India - 160 014  
Ph. No. +91-172-2534421(o)  
+91-09872118810(m)  
Fax No. +91-172-2545074  
**E-mail:** [sonal1174@gmail.com](mailto:sonal1174@gmail.com)

## Supporting Information

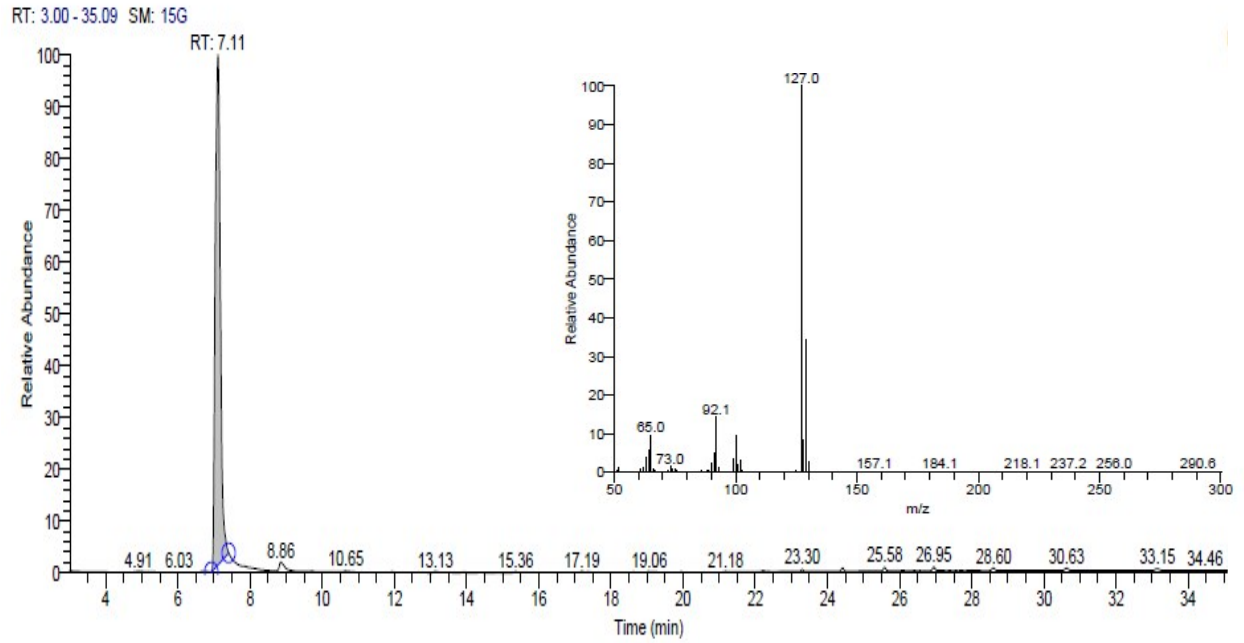

### Qual Peak Table

| RT   | Peak Area      | Area % | Peak Height   |
|------|----------------|--------|---------------|
| 7.11 | 13169334179.82 | 100.00 | 1322781518.25 |

GC-MS-1

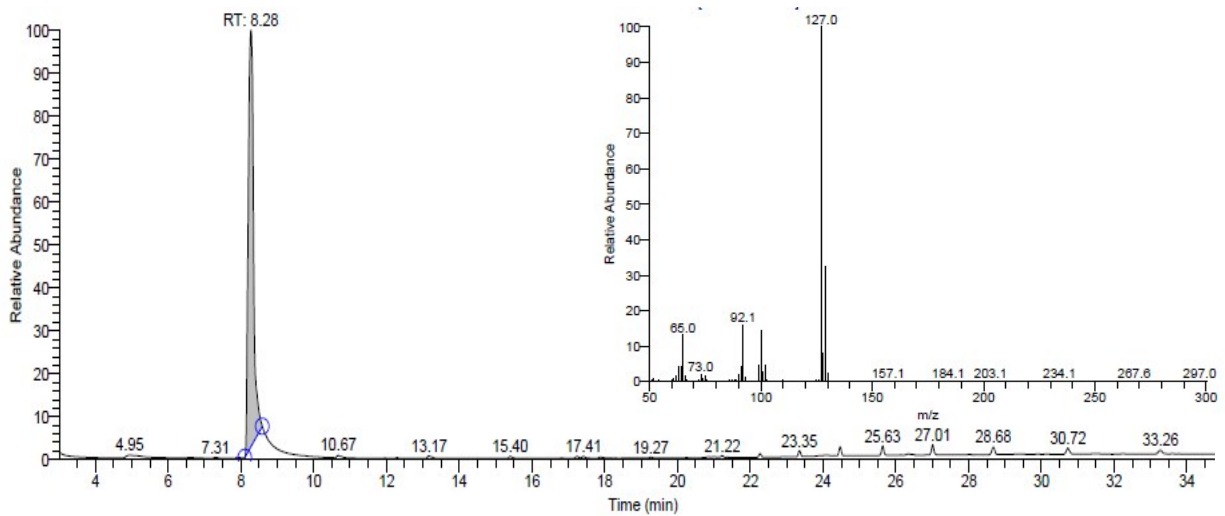

**Qual Peak Table**

| RT   | Peak Area     | Area % | Peak Height  |
|------|---------------|--------|--------------|
| 8.28 | 2189311211.42 | 100.00 | 215754556.08 |

**GC-MS-2**

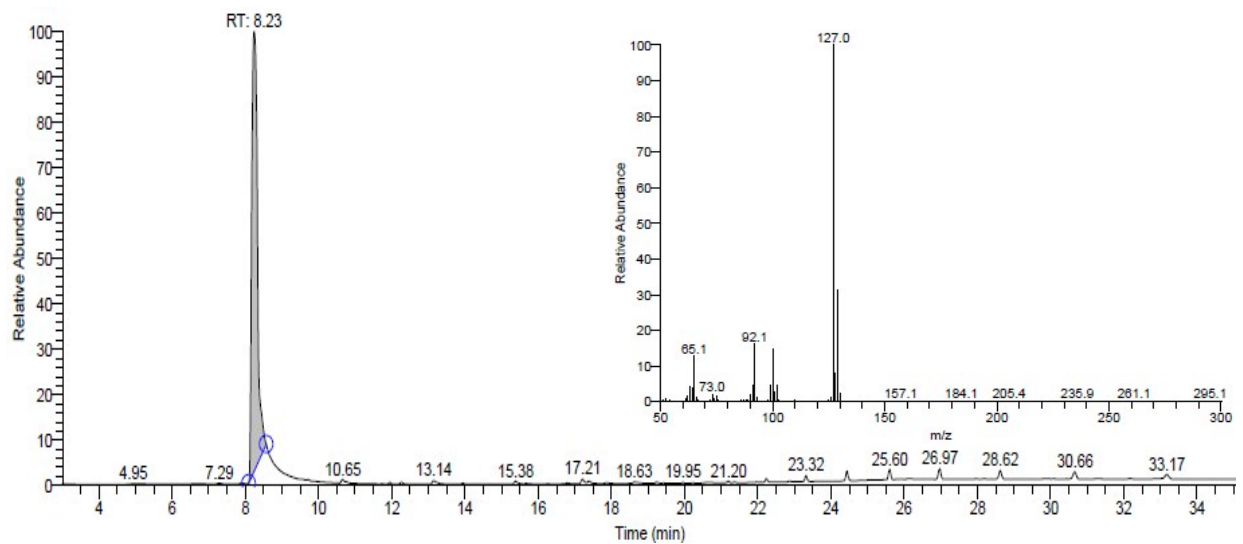

### Qual Peak Table

| RT   | Peak Area    | Area % | Peak Height |
|------|--------------|--------|-------------|
| 8.23 | 511749004.54 | 100.00 | 47347083.99 |

GC-MS-3

RT: 3.00 - 35.09 SM: 15G

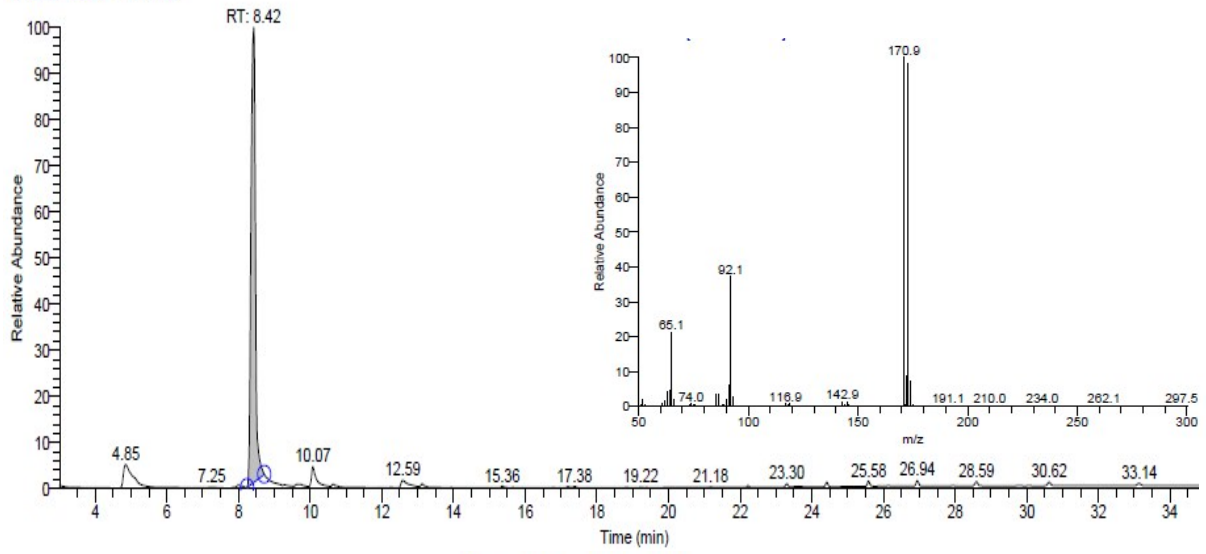

### Qual Peak Table

| RT   | Peak Area      | Area % | Peak Height   |
|------|----------------|--------|---------------|
| 8.42 | 11782228229.99 | 100.00 | 1357242306.85 |

GC-MS-4

RT: 3.00 - 35.12 SM: 15G

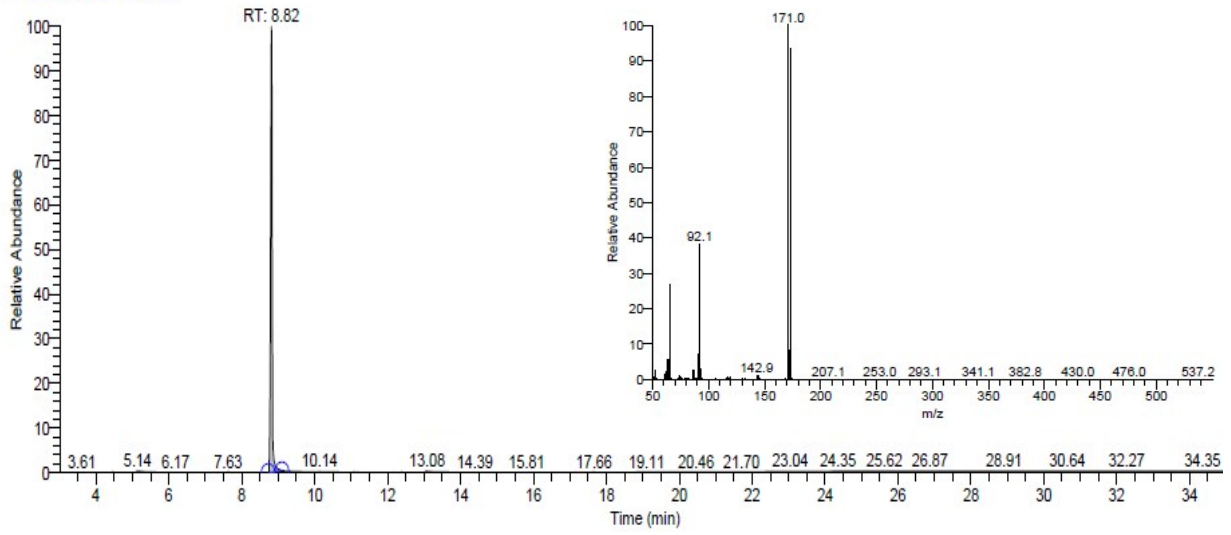

### Qual Peak Table

| RT   | Peak Area     | Area % | Peak Height   |
|------|---------------|--------|---------------|
| 8.82 | 6351149817.09 | 100.00 | 1998334538.26 |

GC-MS-5

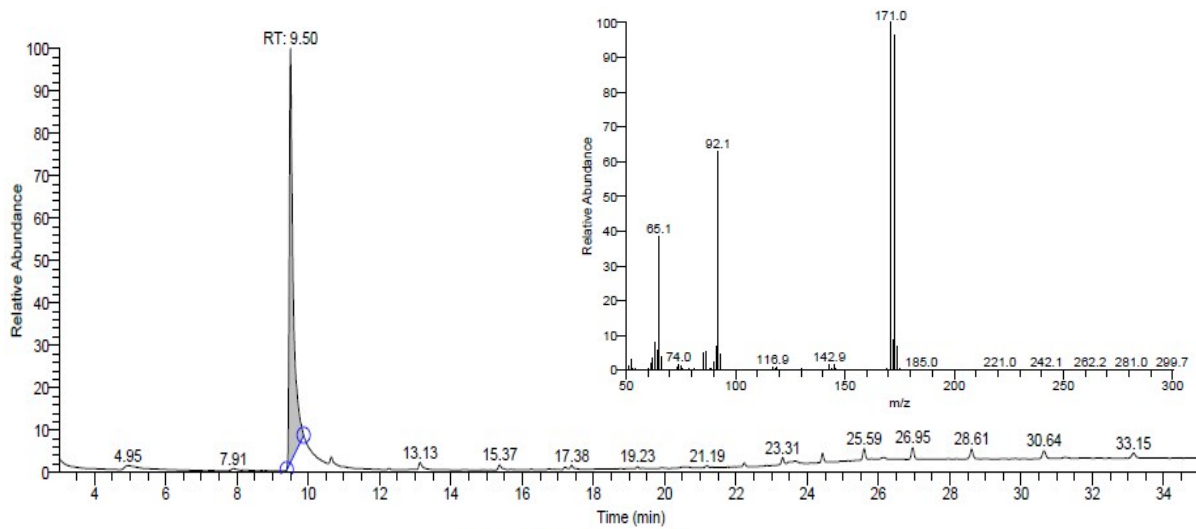

**Qual Peak Table**

| RT   | Peak Area     | Area % | Peak Height  |
|------|---------------|--------|--------------|
| 9.50 | 2247268035.88 | 100.00 | 288660375.69 |

**GC-MS-6**

RT: 3.00 - 35.10 SM: 15G

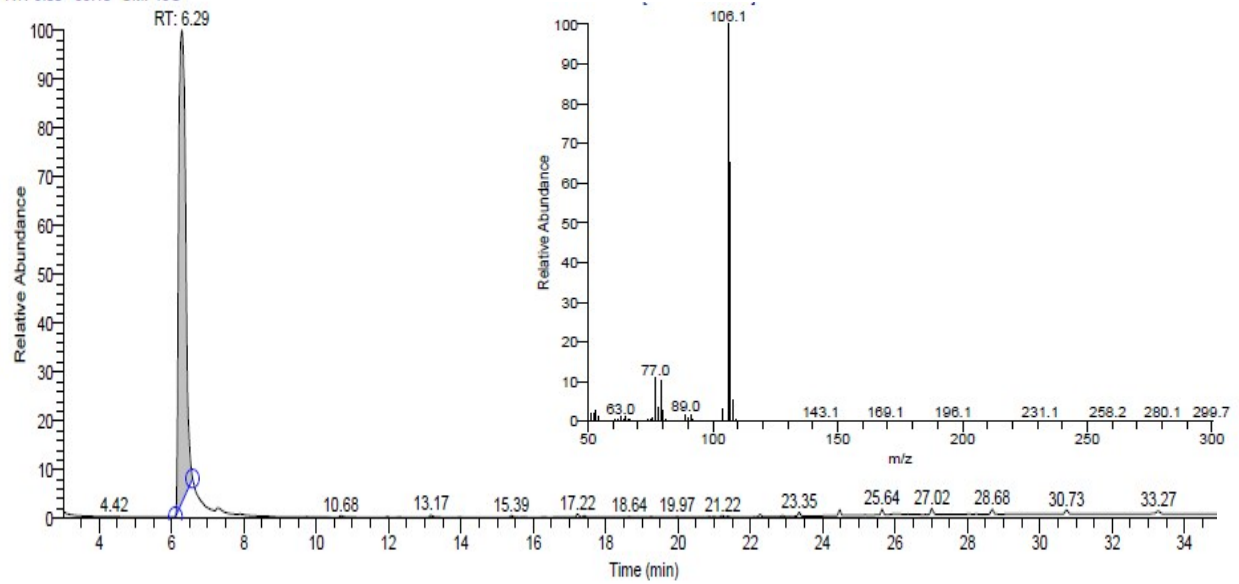

### Qual Peak Table

| RT   | Peak Area     | Area % | Peak Height  |
|------|---------------|--------|--------------|
| 6.29 | 3579364661.61 | 100.00 | 265989954.17 |

GC-MS-7



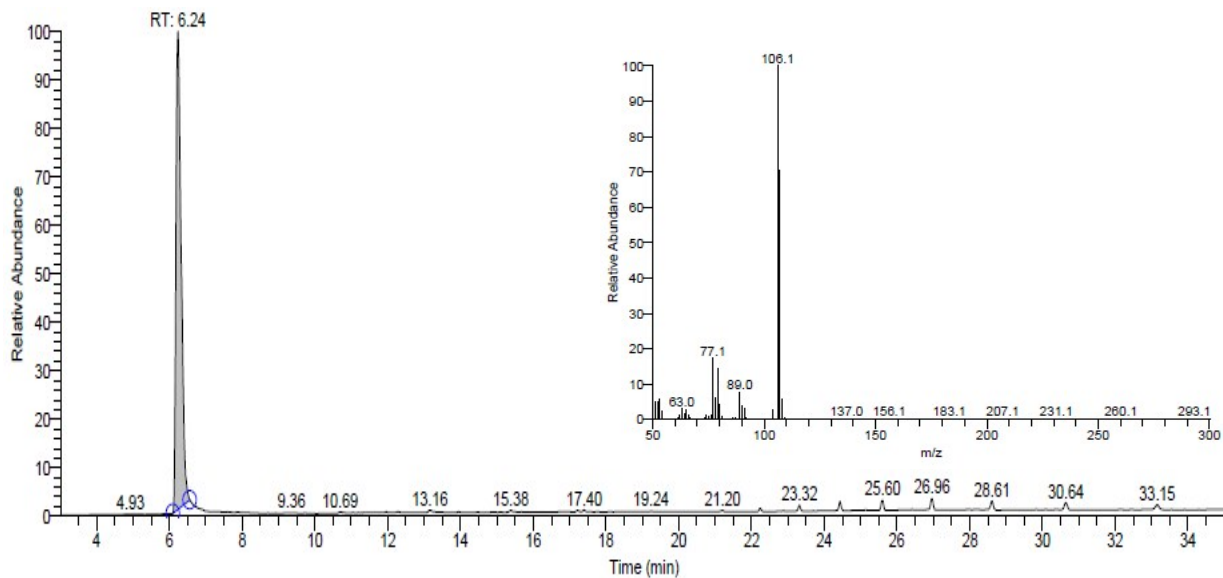

**Qual Peak Table**

| RT   | Peak Area     | Area % | Peak Height  |
|------|---------------|--------|--------------|
| 6.24 | 5719425479.81 | 100.00 | 577778588.35 |

**GC-MS-8**

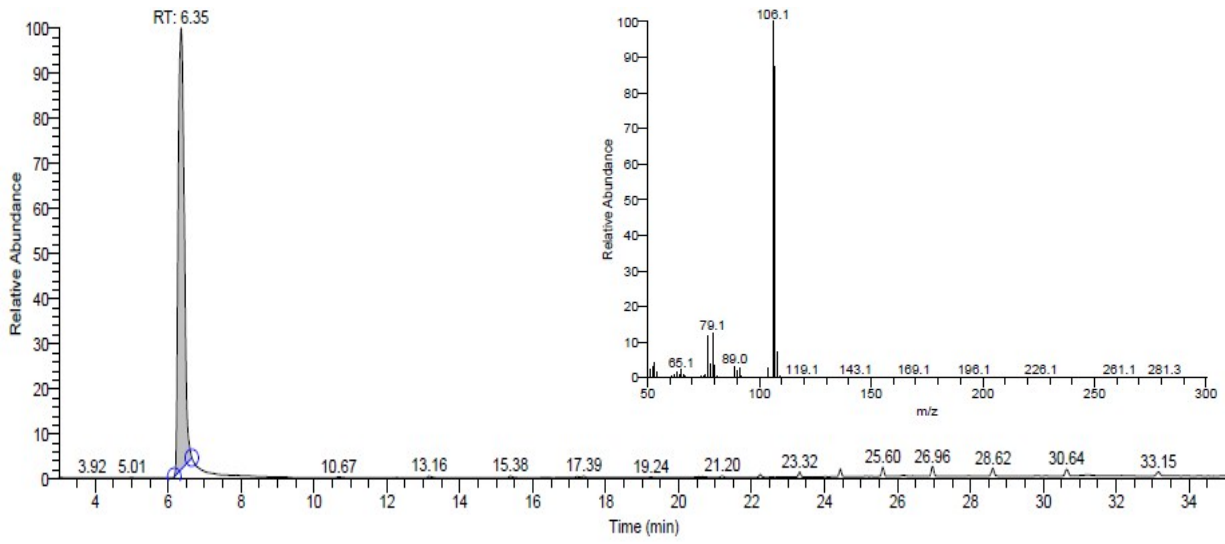

**Qual Peak Table**

| RT   | Peak Area      | Area % | Peak Height   |
|------|----------------|--------|---------------|
| 6.35 | 16283229408.08 | 100.00 | 1403254553.16 |

GC-MS-9

RT: 3.00 - 35.12 SM: 15G

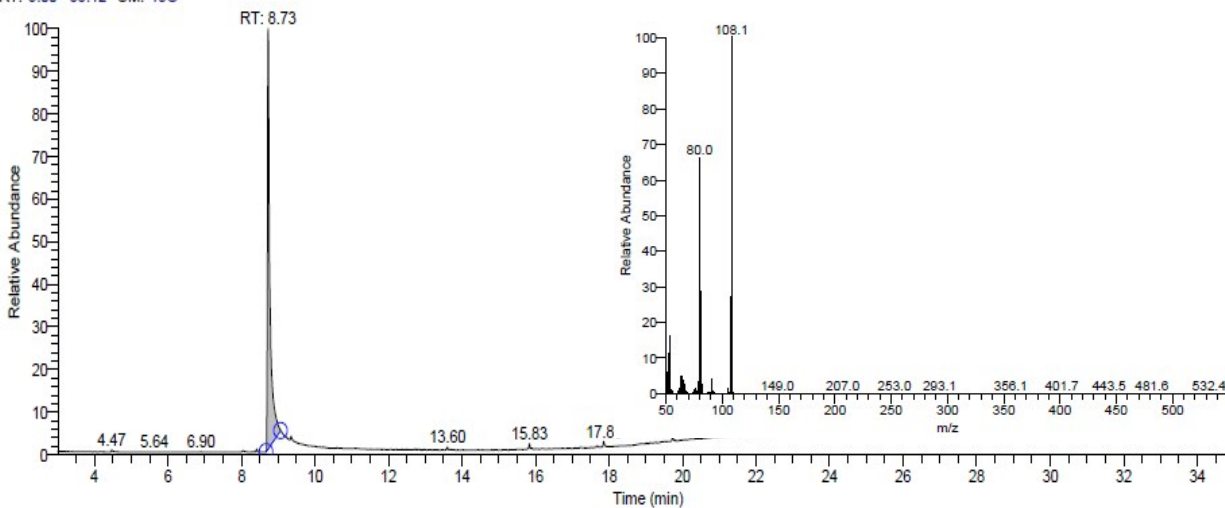

### Qual Peak Table

| RT   | Peak Area     | Area % | Peak Height  |
|------|---------------|--------|--------------|
| 8.73 | 1142251914.07 | 100.00 | 244909687.70 |

GC-MS-10

RT: 3.00 - 30.77 SM: 15G

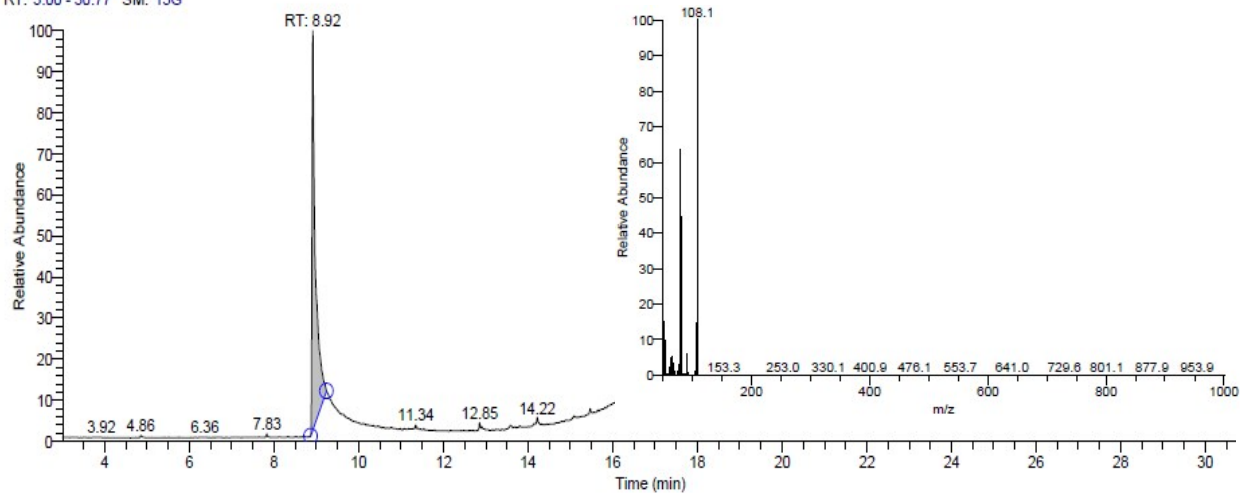

**Qual Peak Table**

| RT   | Peak Area    | Area % | Peak Height |
|------|--------------|--------|-------------|
| 8.92 | 487925273.64 | 100.00 | 85652623.02 |

GC-MS-11

RT: 3.00 - 30.77 SM: 15G

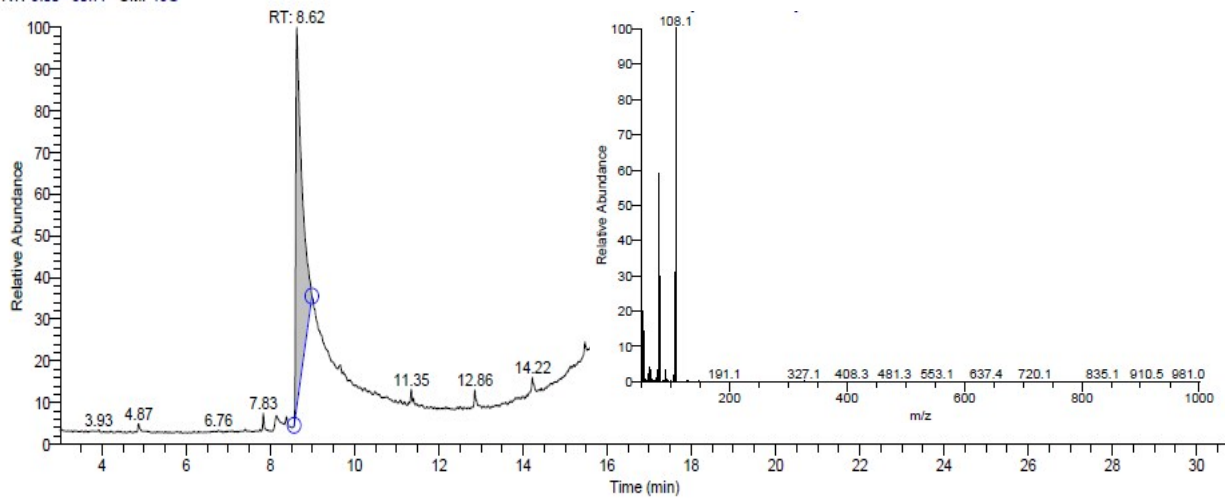

### Qual Peak Table

| RT   | Peak Area    | Area % | Peak Height |
|------|--------------|--------|-------------|
| 8.62 | 228405769.40 | 100.00 | 22468360.75 |

GC-MS-12

RT: 3.00 - 35.11 SM: 15G

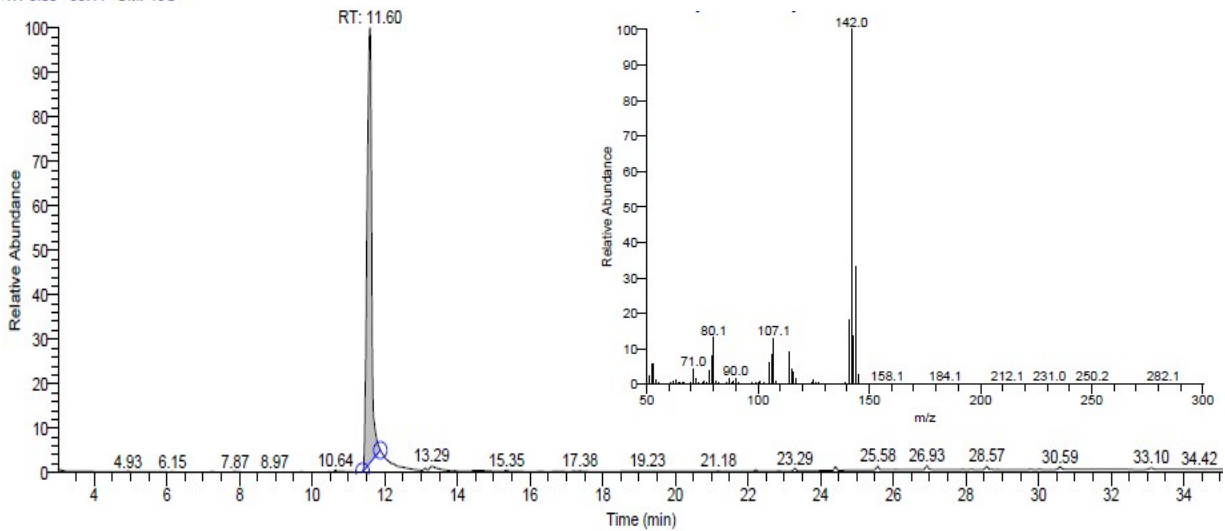

### Qual Peak Table

| RT    | Peak Area     | Area % | Peak Height  |
|-------|---------------|--------|--------------|
| 11.60 | 8716567208.49 | 100.00 | 971002686.03 |

GC-MS-13

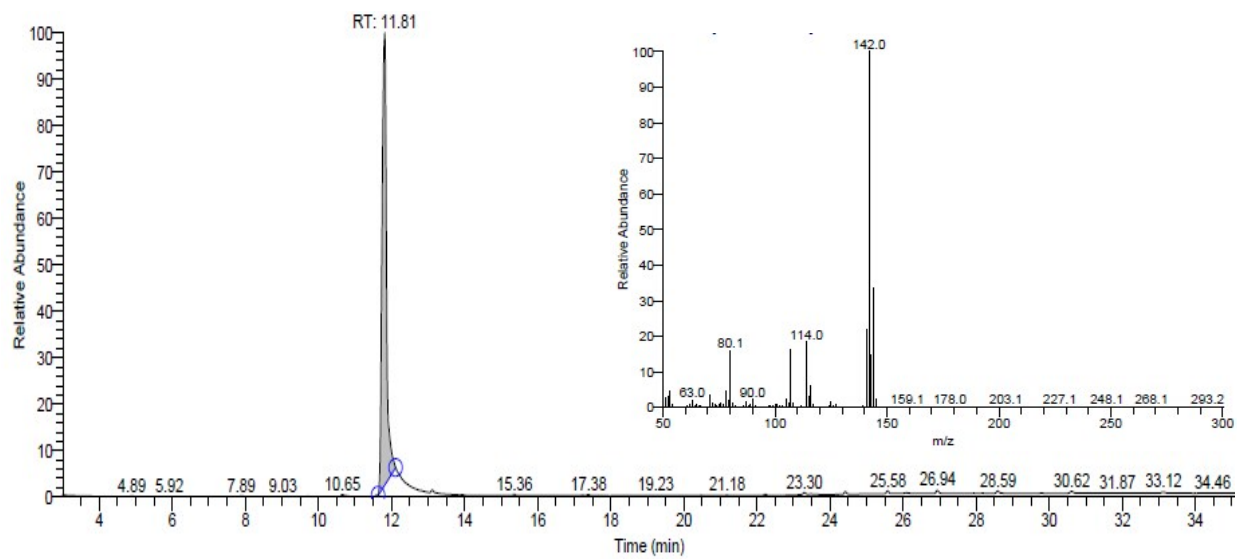

**Qual Peak Table**

| RT    | Peak Area      | Area % | Peak Height   |
|-------|----------------|--------|---------------|
| 11.81 | 11043157107.06 | 100.00 | 1278253047.54 |

**GC-MS-14**

RT: 3.00 - 35.09 SM: 7G

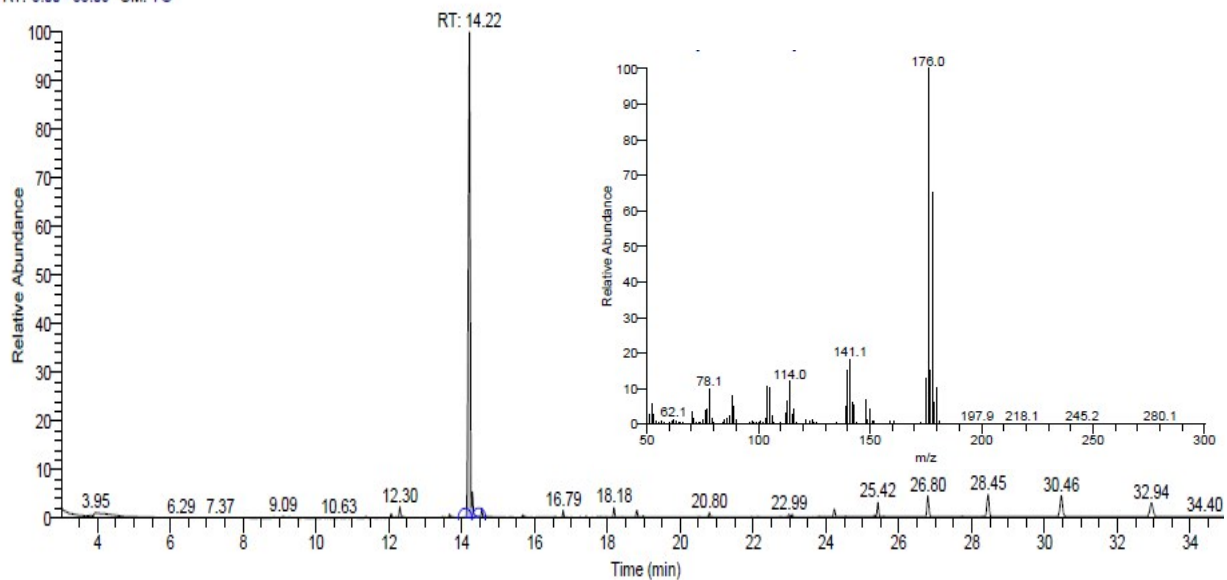

**Qual Peak Table**

| RT    | Peak Area      | Area % | Peak Height   |
|-------|----------------|--------|---------------|
| 14.22 | 10895095772.09 | 100.00 | 2793003321.13 |

**GC-MS-15**
